## **The energy landscape reshaped by strain-specific mutations underlies the long-range epistasis in NS1 evolution of influenza A virus**

Iktae Kim<sup>1</sup>, Alyssa Dubrow<sup>1</sup>, Bryan Zuniga<sup>1</sup>, Baoyu Zhao<sup>1</sup>, Noah Sherer<sup>1</sup>, Abhishek Bastiray<sup>1</sup>, Pingwei Li<sup>1</sup>, Jae-Hyun Cho<sup>1,\*</sup>

<sup>1</sup>Department of Biochemistry and Biophysics, Texas A&M University, College Station, TX77843

\*Corresponding author. Email: [jaehyun.cho@agnet.tamu.edu](mailto:jaehyun.cho@agnet.tamu.edu)

## Abstract

The mechanisms underlying how individual mutations affect the protein energy landscape are crucial for understanding how proteins evolve. However, predicting mutational effects remains challenging because of epistasis—the nonadditive interactions between mutations. Here, we investigate the biophysical mechanism of strain-specific epistasis in the nonstructural protein 1 (NS1) of the influenza A virus (IAV). To understand the molecular basis of epistasis, we conducted comprehensive analyses of four NS1s of IAV strains that emerged between 1918 and 2004. We find that strain-specific mutations of NS1s are near-neutral with respect to the association with the p85 $\beta$  subunit of PI3K. However, the individual residues on the p85 $\beta$ -binding interface show long-range epistatic interactions with strain-specific mutations. We reveal that strain-specific mutations reshaped the energy landscape of NS1, leading to long-range epistasis. Our findings offer a high-resolution mechanism of how near-neutral mutations silently alter the biophysical energy landscapes, resulting in diverse background effects during molecular evolution.

## Introduction

Addressing the relationship between mutations and their effects on the functional landscape can provide a detailed evolutionary trajectory of a protein (1). However, nonadditive interactions between mutations make comprehensive mapping of this sequence-function space extremely difficult to achieve, if not impossible (2).

For example, the effects of two single mutations at sites a and b denoted as  $\Delta G_a$  and  $\Delta G_b$ , respectively, can make the double mutant of the two sites show either additive ( $\Delta\Delta G_{a,b} = \Delta G_a + \Delta G_b$ ) or nonadditive behaviors ( $\Delta\Delta G_{a,b} \neq \Delta G_a + \Delta G_b$ ) (3). Epistasis refers to the nonadditive effect between two mutations. Various patterns of epistatic interactions are possible, and the same mutation can result in different outcomes for different backgrounds (3, 4). Epistasis also allows neutral or near-neutral mutations to have an evolutionary impact by diversifying genetic backgrounds, which might serve as a pre-adapted platform in a new environment (5-7). Alternatively, these mutations may serve permissive roles in which subsequent mutations would otherwise be deleterious (8, 9).

Although many studies on epistasis have focused on mutational effects on the functional landscape, mapping the mutational effect on the energy landscape is critical for understanding the mechanistic basis of epistasis (10, 11). In particular, since neutral mutations are functionally silent on their own, deep mechanistic studies on how they alter biophysical traits of a protein are essential (6, 8).

From the physical perspective, epistasis can be classified as a short- or long-range mutational effect. While a short-range epistatic interaction between directly contacting residues is structurally intuitive, the mechanistic basis of long-range epistatic interactions between spatially distant residues requires further refinement, although some interesting mechanisms are available (12-15). Moreover, epistatic effects of neutral mutations often occur through long-range interactions (8, 16). Thus, the biophysical foundation of long-range epistasis can help understand how neutral mutations contribute to protein evolution (9).

In this study, we trace evolutionary changes in the *in vitro* functional and biophysical traits of nonstructural protein 1 (NS1) of influenza A viruses (IAV). To this end, we selected four NS1s of human IAV strains that emerged between 1918 and 2004: 1918 H1N1, Puerto Rico 8 (PR8) H1N1, Udorn (Ud) H3N2, and Vietnam (VN) H5N1.

NS1 of an influenza virus is a multifunctional virulence factor that antagonizes the innate immune response of hosts and is associated with many strain-specific functions in viral replication and host range (17, 18). Moreover, NS1 is one of the most frequently mutated (19) and mutation-tolerant proteins (20) in the IAV genome. Multiple strain-specific mutations in NS1 were identified as adaptive mutations with respect to viral virulence and replication (21, 22); however, many remain uncharacterized, mainly because of a lack of functional phenotypes. Especially, many mutations occur in the effector domain (ED) of NS1 that interacts with a number of host factors, including RIG-I (retinoic acid-inducible gene 1), TRIM25 (tripartite motif containing 25), and PI3K (phosphoinositide 3-kinase), during the infection cycle (23-26).

Outlining the present study, we first present that strain-specific mutations in NS1 EDs have near-neutral effects on the association kinetics to the p85 $\beta$  subunit of PI3K. We subsequently find that the near-neutral, strain-specific mutations have long-range epistatic interactions with the residues on the p85 $\beta$ -binding interface of NS1. Using isothermal titration calorimetry (ITC), we then find

evidence that strain-specific mutations altered the thermodynamic energy landscape of the NS1:p85 $\beta$  interaction. To further address how strain-specific mutations altered the energy landscape of NS1s and enabled long-range epistasis during evolution, we conducted extensive biophysical analyses of NS1s. Structural analyses revealed conformational variations occurred along with NS1 evolution. Especially, using NMR spin dynamics of backbones and side-chains, we reveal how strain-specific mutations influence long-range epistasis through dynamic reorganization of packing interactions in the hydrophobic core. Consequently, our study provides a high-resolution mechanism by which neutral mutations contribute to protein evolution by reshaping the energy landscape despite the absence of functional changes.

## Results

### Strain-specific epistasis in NS1

The four NS1 EDs (referred to as NS1s) employed in this study contain 3–14 % of residues that are strain-specifically mutated in the protein sequence with respect to the 1918 NS1 (**Fig. S1A**). Many of the mutations are conservative between similar types of amino acids located at buried or partially buried sites in the NS1 structure; the average relative solvent accessible surface area of mutated residues was 32.2% (**Figs. 1A and 1B and Fig. S1B**).

To study the functional effect of strain-specific mutations, we first confirmed that all four NS1s bind to the full-length PI3K using co-immunoprecipitation (**Fig. S2A**). Next, we characterized the interaction between NS1 and p85 $\beta$  using BLI (Biolayer interferometry). Compared to the 1918 NS1, other NS1s dissociated from p85 $\beta$  with a smaller dissociation rate constant, resulting in a moderately higher binding affinity to p85 $\beta$  (**Fig. 1C and Figs. S2B-E**).

However, there was no difference in the binding among the later strains of 1918 IAV; namely, PR8, Ud, and VN NS1s shared virtually identical binding ( $k_{on}$ ) and unbinding ( $k_{off}$ ) rate constants (**Fig. 1C**). Notably, the  $k_{on}$  value was highly similar in all four NS1s, including 1918 NS1, showing that strain-specific mutations across the NS1s have a near-neutral effect on the p85 $\beta$ -binding rate constant. These results also suggest that  $k_{on}$  is a biophysical constraint of NS1 evolution (27, 28).

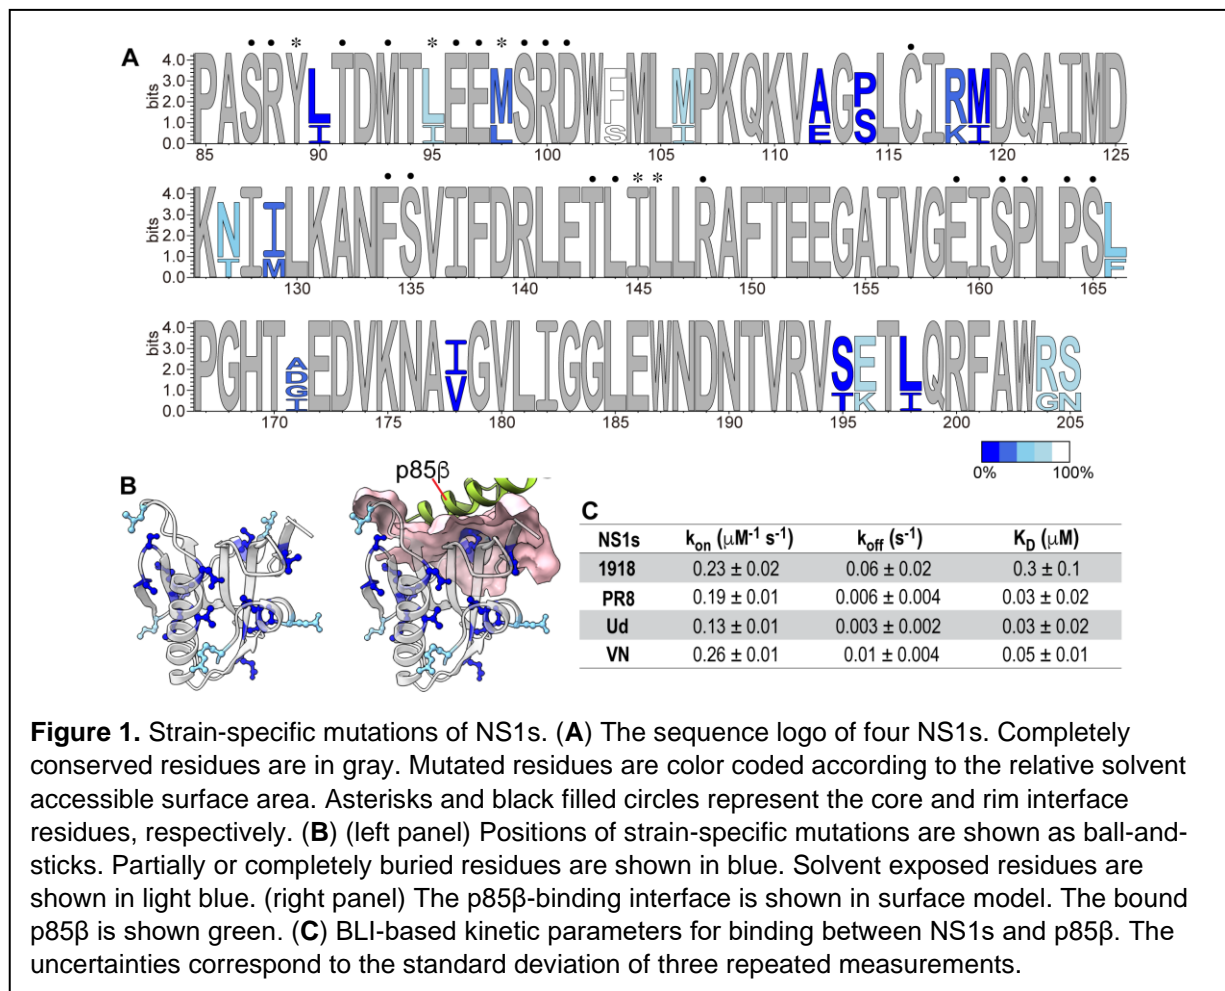

We further tested whether the energetic contribution of the individual p85 $\beta$ -binding residues to  $k_{on}$  is conserved across different NS1 backgrounds (**Fig. S3**). The p85 $\beta$ -binding interface on NS1 consists of 20 residues based on the crystal structure of the complex (23, 29), while our previous study identified residues 89, 95, 98, 145, and 146 of NS1 as the major players determining the p85 $\beta$ -binding rate constant(29); thus, these residues are referred to as core interface residues (**Fig. 2A**).

Using Ala-scanning mutagenesis (30), we measured the extent to which individual core interface residues contribute to the p85 $\beta$ -binding rate constant in the four NS1 backgrounds. For Y89, however, we incorporated F89 instead of A89 because the Y89A mutation reduced binding too much to quantify the effect. We first calculated  $\Delta G_{on}$  (WT – MT) of the individual mutants with respect to their wild-type constructs (**Fig. 2B**); a larger negative number means a larger deleterious effect of a mutation. Notably, individual core interface residues have substantially different binding energetics in different NS1 backgrounds (**Fig. 2C**). Next, to follow the evolutionary trajectory of the binding energetics at the residue level, we plotted the  $\Delta G_{on}$  of the core interface residues along with the year of occurrence of IAV strains (**Fig. 2D**). Overall, the energetic contribution of core residues decreased from 1918 to 1972 (Ud) and then increased in 2004 (VN).

These background-dependent mutational effects suggest that the core binding residues are energetically coupled with strain-specific mutations of NS1, i.e., epistatic interactions. So, we measured the epistatic interactions using a thermodynamic cycle analysis (**Figs. 2E-G** and **Fig. S4**). Note that we considered a different NS1 background as a single mutant, although multiple mutations are involved in different NS1s. Thus, energetic coupling (i.e., epistasis) in our study represents the interaction between mutations of individual core interface residues and the collection of strain-specific residues. Following the standard notation for epistasis (4), here, we define that positive and negative epistasis corresponds to less (i.e., larger  $k_{on}$  values) and more (i.e., smaller  $k_{on}$  values) deleterious effects, respectively, by a double mutation than the sum of two single mutational effects.

Indeed, we observed various types of epistasis, including positive, negative, and sign epistasis (**Fig. S4**). Moreover, the same residue exhibited different types of epistasis depending on the choice of NS1 background. For example, Y89F showed sign epistasis between the 1918 and PR8 NS1 backgrounds but negative epistasis between Ud and VN NS1 backgrounds (**Figs. 2E-G**).

Then, to examine the evolutionary trajectory of epistasis, we calculated how the epistatic interaction evolved in different NS1s relative to the 1918 NS1 (**Fig. S5**). This trajectory is equivalent to cumulative epistatic interactions starting in 1918. Overall, core interface residues showed positive epistatic interactions with strain-specific mutations between 1918 and 1972, indicating that the binding interface mutations have less deleterious effects on  $k_{on}$  values of NS1s of later IAV strains. This trend reversed between 1972 and 2004, with large negative epistasis. As a result, overall epistatic interactions seemed to fluctuate around null epistasis. This outcome indicates that strain-specific mutations have near-neutral effects on the overall association kinetics, while they altered the energetic contribution of individual residues during NS1 evolution. Structurally, however, the majority of strain-specific mutations are located remotely from the p85 $\beta$ -binding interface, indicating long-range epistasis (**Fig. 1B**).

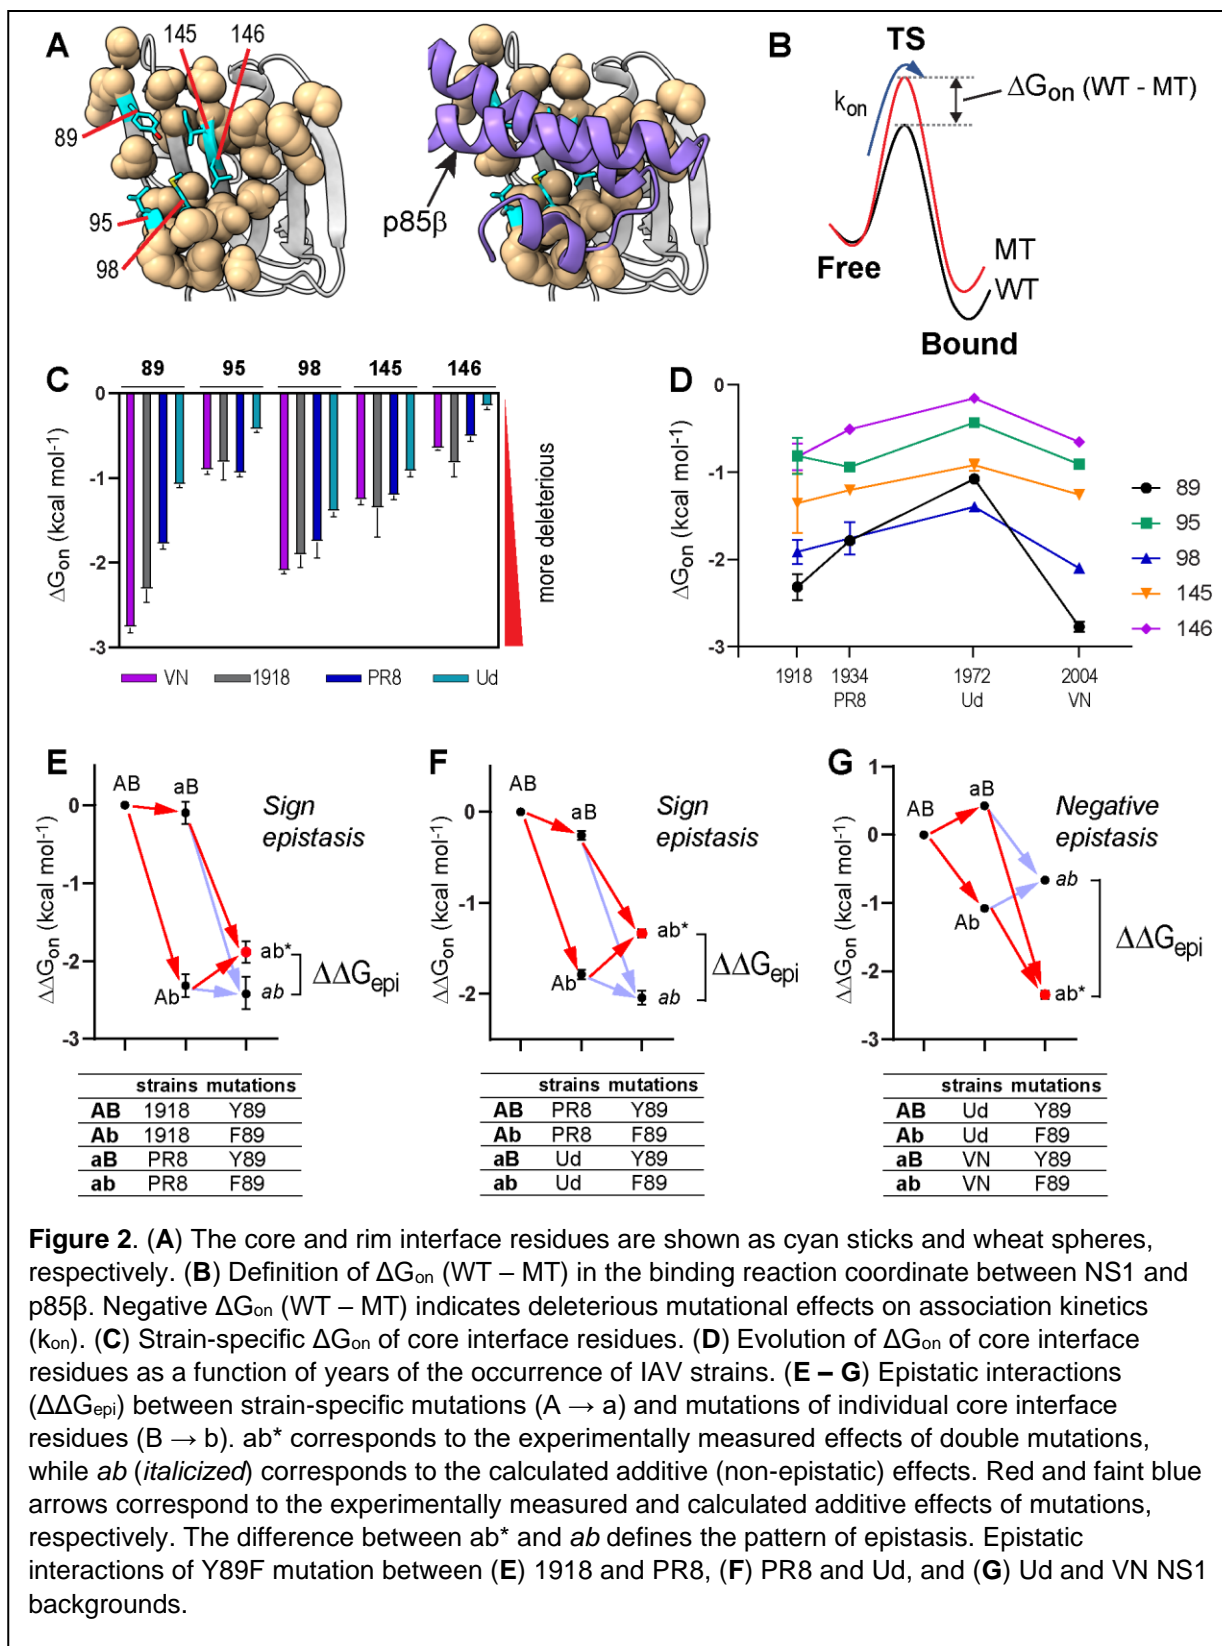



## Strain-specific mutations reshaped the energy landscape of NS1

Long-range epistasis—energetic coupling between distant residues—suggests that strain-specific mutations altered the protein energy landscape(3, 4). The protein energy landscape can be probed by examining biophysical properties such as binding thermodynamics(31). Thus, we characterized the thermodynamic signature for the binding of NS1s to p85 $\beta$  using isothermal titration calorimetry (ITC). Here, changes in binding thermodynamic signature across NS1s represent the evolution of the binding energy landscape accompanying changes in enthalpic ( $\Delta H$ ) and entropic ( $T\Delta S$ ) properties.

Overall, binding was driven by favorable enthalpy and entropy changes (**Figs. 3A and 3B**). However, Ud NS1 showed a striking difference from other NS1s in that the binding was not accompanied by measurable heat; that is, the binding was driven exclusively by a favorable entropy change (**Figs. 3A and 3B**). Although minor compared to Ud NS1, other NS1s also showed sizable variations in thermodynamic signature, indicating strain-specific variations in the binding energy landscape.

This result is surprising because the protein sequence of the p85 $\beta$ -binding interface is almost completely conserved across the NS1s. The only difference is that Ud NS1 contains mutations at two of the 20 interface residues compared to the other three NS1s. However, these mutations are isosteric: L to I and M to L for residues 95 and 98, respectively (**Figs. 3C and 3D**). Moreover, grafting the Ud sequence to 1918 NS1 did not affect its binding to p85 $\beta$  (23).

To further confirm that the two mutations are not responsible for the drastic change in the thermodynamic signature, we incorporated I95L/L98M mutations into Ud NS1; i.e., this mutant contains the same sequence in the binding interface as other NS1s. ITC data showed that the binding of Ud-I95L/L98M to p85 $\beta$  is not accompanied by heat as in wild-type Ud NS1 (**Figs. 3A and 3B**). We also tested the effect of grafting the Ud sequence to the PR8 background (i.e., PR8 L95I/M98L) and found no significant change in the thermodynamic signature for binding to p85 $\beta$  compared to that of wild-type PR8 NS1 (**Figs. 3A and 3B**). These results demonstrated that the direct binding interface is not responsible for the variation in the thermodynamic signature for binding. Instead, our results suggested that strain-specific mutations reshaped the energy landscape of NS1 via long-range interactions, resulting in strain-dependent thermodynamic signatures for binding to p85 $\beta$ .

These results are reminiscent of the recent finding that proteins explore diverse thermodynamic mechanisms by neutral or selective mutations during adaption to high temperatures, referred to as thermodynamic systems drift(32). Thus, our results support the notion that proteins can acquire the same functional phenotype using completely different biophysical mechanisms (32-34).



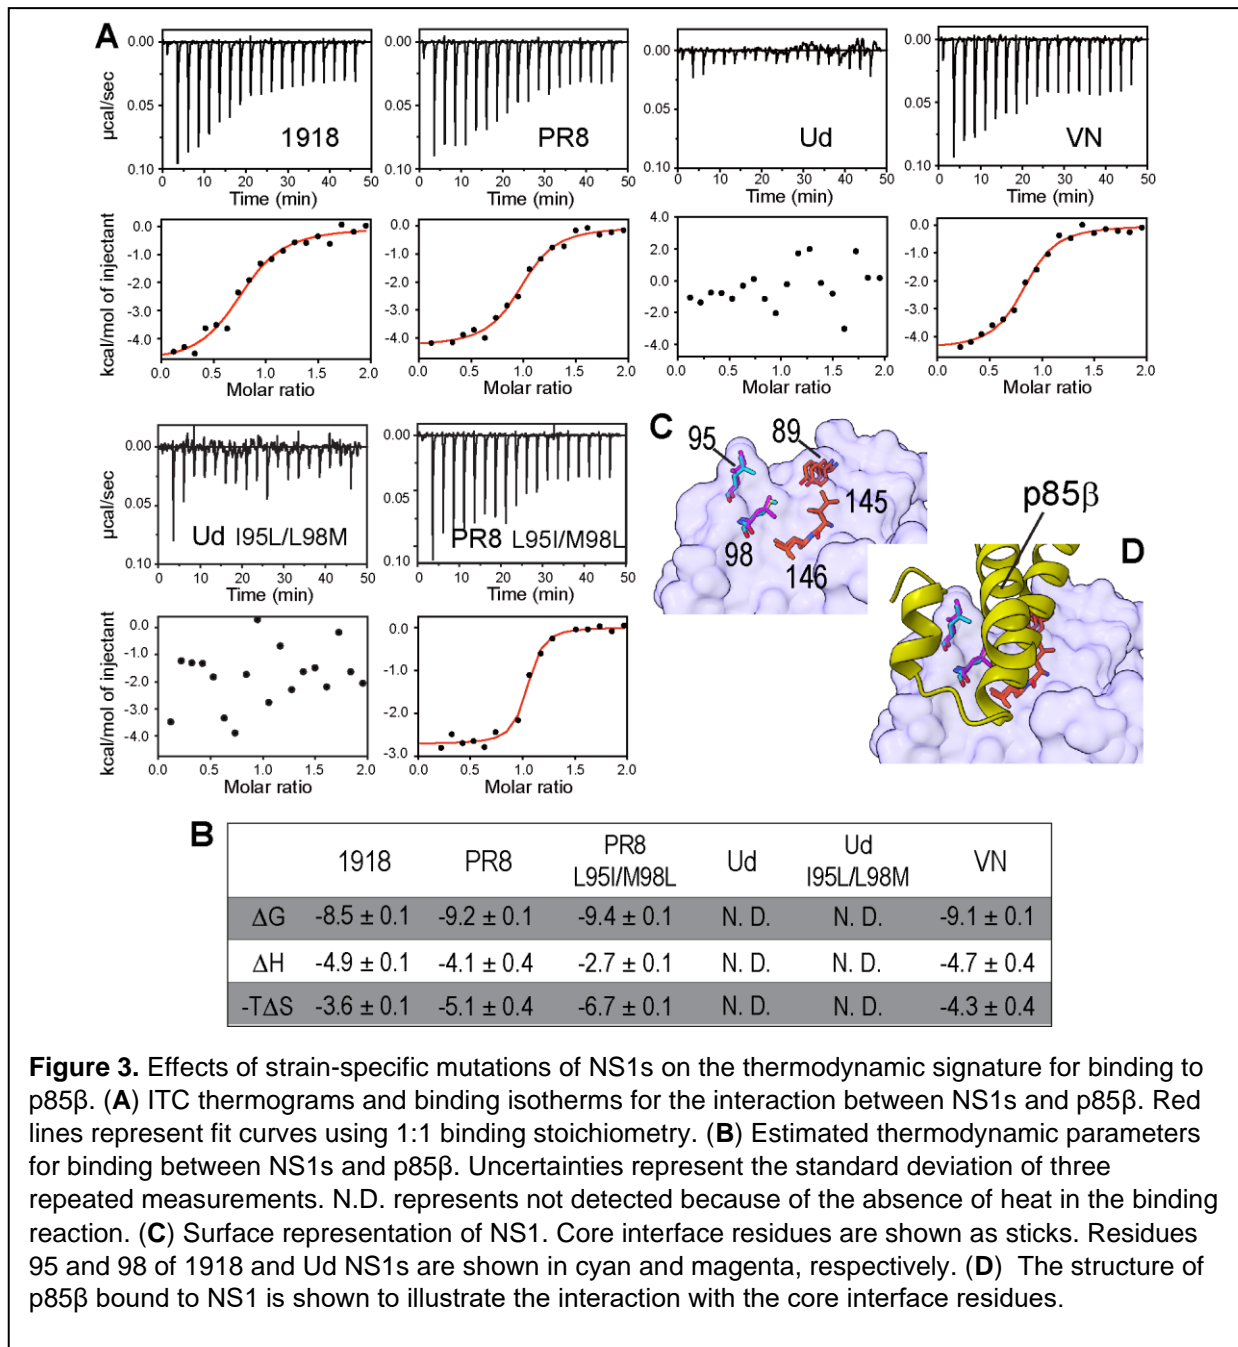

## NS1s have the same structures in the complexes with p85 $\beta$

To reveal the mechanistic bases of long-range epistasis and how strain-specific mutations reshaped the energy landscape of NS1 during evolution, we first examined the structure of the NS1:p85 $\beta$  complexes. Noticeable changes in the complex structures could be a plausible explanation for the strain-specific epistasis and variation in the thermodynamic signature. The structure of the NS1:p85 $\beta$  complex was available for 1918 and PR8 NS1s (23, 35), and we determined a new crystal structure of VN NS1 bound to p85 $\beta$  in this study (**Table S1**).

Interestingly, the conformations of NS1s in the complexes were almost identical, with RMSD < 0.5 Å (**Figs. 4A and 4B**). Although the complex structure of Ud NS1 is not available, it is reasonable to assume that it has a structure similar to other NS1s, considering the sequence identity in the binding interface. This result indicated that the complex structure is not responsible for strain-specific mutational effects on NS1.

Given the structural invariance of the complexes, we hypothesized that the structure and dynamics of NS1 in the unbound state are most likely responsible for the strain-specific epistasis and thermodynamic signature for binding. The following observations further support this hypothesis. The observed epistasis represents the change in the free-energy difference between the unbound and transition states (**Fig. 2B**), and the ITC result corresponds to the free-energy difference between the unbound and bound states. Therefore, both results are directly related to the structure and dynamics of free NS1.

## Conformational energy landscape of free NS1

To study the evolutionary influence on the conformation of free NS1, we first compared all the crystal structures of free NS1s ( $n = 16$ ) of the four IAV strains available in PDB. The structural alignment showed substantial conformational heterogeneity among free NS1s (**Figs. 4A and 4C**). Previously, we showed that 1918 NS1 populates two conformations(23): p85 $\beta$  binding-competent (BC) and -incompetent (BI) conformers (**Fig. 4D**). Indeed, hierarchical cluster analysis showed that all 16 crystal structures could be clustered into either BI-like or BC-like conformations (**Fig. 4E**).

However, which of the BI and BC states represents the major conformer in the solution remained uncertain. To identify the major conformer of free NS1s, we compared NMR NOESY cross-peaks specific to either BI-like or BC-like conformers. Based on the NOESY cross-peaks pattern, we concluded that the free NS1s of the four IAV strains populate the BC-like conformer as the major species (**Fig. S6**).

Considering the presence of the two groups of crystal structures, it is likely that the BC state of NS1 undergoes conformational exchange with the BI state. We further characterized the BI-BC conformational dynamics using the NMR  $^{15}\text{N}$  CPMG relaxation dispersion (36-38). Indeed, PR8 and VN NS1s underwent the BI-BC dynamics on a sub-ms timescale (**Fig. 4F** and **Fig. S7**). Our previous study showed that 1918 NS1 also undergoes the BI-BC conformational dynamics on a similar timescale (23). The analysis of slow-exchanging residues on the NMR timescale revealed that the population of the BC-like conformer was ~99% for PR8 and VN NS1s and ~90% for 1918 NS1 (**Fig. S7**).

On the contrary, Ud NS1 was static and only populated the BC conformer (>99%) (**Fig. 4F**) (23), which is consistent with the fact that all available Ud NS1 structures showed only a BC-like

conformer. Although Ud NS1 could be dynamic in different timescales that are not detectable by NMR CPMG-RD, it was obvious that strain-specific mutations reshaped the energy landscape of free NS1s, as evidenced by altered conformational dynamics (**Fig. 4F**).

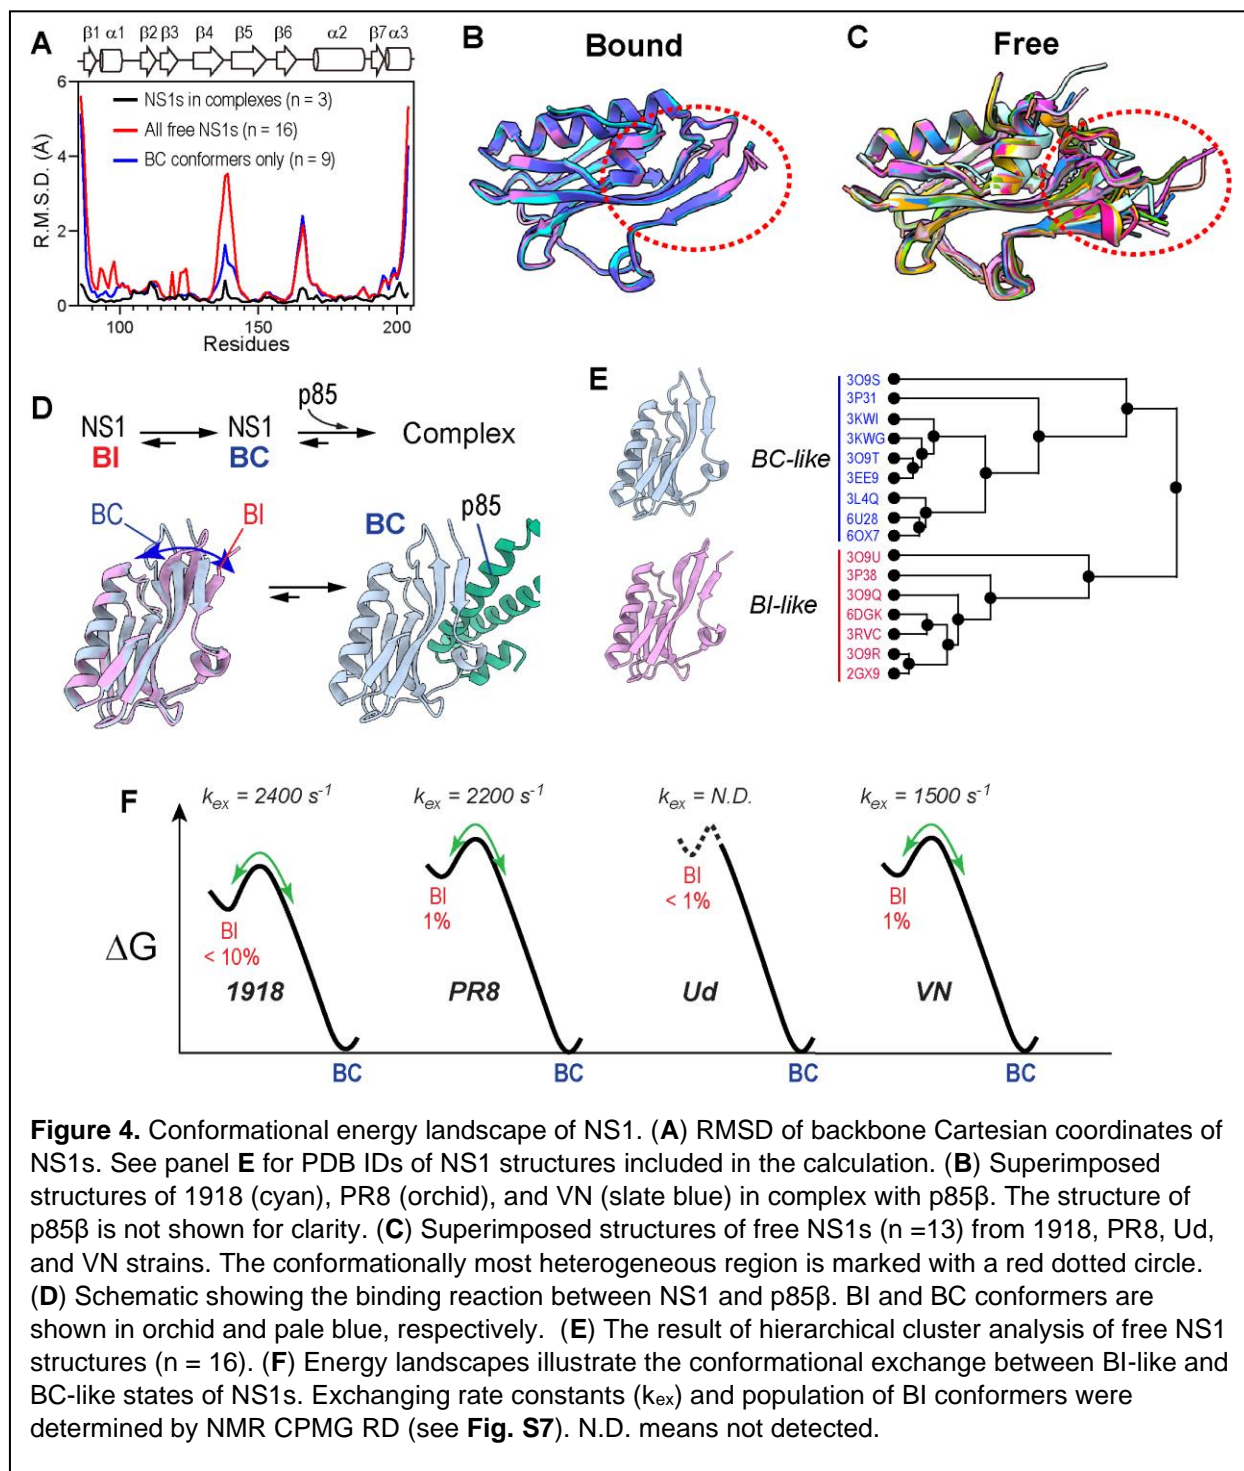

Given that the epistatic interactions were probed based on the mutational effects on binding rate constants, we expected that the energy landscapes of the BC state differ strain-specifically; the BC conformer is the major species and responsible for binding to p85 $\beta$ . Therefore, we examined the conformational variations in the BC state between NS1s.

To this end, we compared NMR chemical shifts (CS) of the backbone amide ( $^1\text{H}$  and  $^{15}\text{N}$ ) in four NS1s (**Fig. 5A** and **Fig. S8**). The root-mean-square deviation of chemical shift (RMSD-CS) among the NS1s reports the evolutionary variation in the conformation of the BC state. In other words, conformational fluctuations of NS1 during evolution can be mapped in a site-specific manner using RMSD-CS. Residues with an RMSD-CS larger than the third quartile Q3 were identified as structurally variable residues across NS1s (**Figs. 5A and 5B**). Here, we excluded strain-specific mutations from the calculation of Q3; note that the inclusion of mutated residues altered the selection of only five residues and did not affect our analysis.

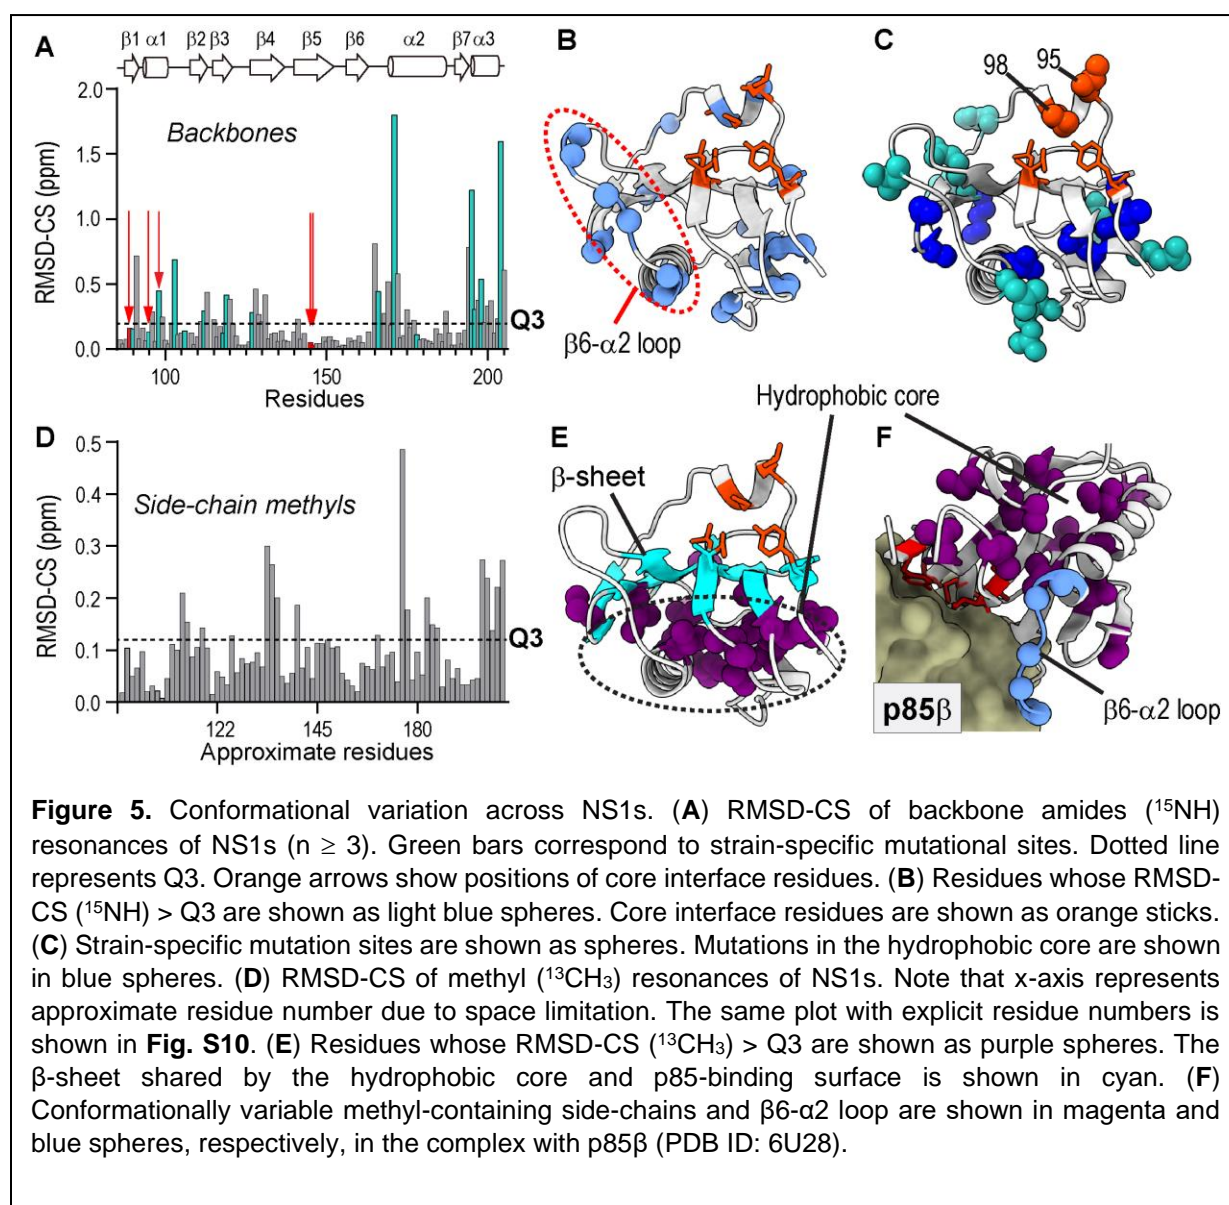



Many of the identified residues are spatially close to the mutation sites (**Figs. 5A-C**), indicating that the chemical shift changes represent mutational effects on the conformation of nearby residues. Moreover, the rim interface showed conformational variation across NS1s; for example, several residues in the  $\beta$ 6- $\alpha$ 2 loop in the rim interface showed conformational variation (**Fig. 5B**). This result is also consistent with the crystallographic analysis of BC conformers (**Fig. 4A**; blue line).

To further examine the side-chain conformational changes, we compared RMSD-CS of side-chain methyl resonances ( $^1\text{H}$  and  $^{13}\text{C}$ ) of Ile, Leu, Val, Thr, Met, and Ala (ILVTMA) in four NS1s (**Fig. 5D** and **Figs. S9 and S10**, and **Table S2-S5**). Notably, all conformationally variable side-chains (i.e., RMSD-CS > Q3) clustered in the hydrophobic core (**Fig. 5E**). The hydrophobic core is spatially located on the opposite side of the  $\beta$ -sheet harboring core p85 $\beta$ -binding residues (**Fig. 5E and 5F**). Moreover, the hydrophobic core contains multiple strain-specific mutation sites (**Fig. 5C**). This result indicates that the hydrophobic core might play a key role in transmitting mutational effects to the p85 $\beta$ -binding interface through a long-distance network of physical contacts. Notably, none of the core interface residues showed considerable conformational variation across NS1s, while the hydrophobic core and rim interface (i.e.,  $\beta$ 6- $\alpha$ 2 loop) were sensitive to strain-specific mutations (**Fig. 5F**).

### **Strain-specific mutations altered the structural dynamics of the hydrophobic core of NS1**

The conformational variations in the hydrophobic core and rim interface across NS1s can result from diverse biophysical mechanisms (32, 34). Thus, we further examined the mechanistic basis of the long-range mutational effects on the rim interface.

We first tested whether the evolutionary conformational variation of NS1 is the result of changes in the overall protein stability. Long-range epistasis can be mediated by differential mutational effects on protein stability (4, 11, 39, 40). We measured the protein stability of NS1s using H/D-exchange coupled with NMR. Intriguingly, all four NS1s showed similar global protein stability (**Fig. S11**), indicating that the long-range epistasis is not due to the differential stability of NS1s. These results also suggest that the stability of NS1s was already optimized during natural evolution.

Protein motion is another commonly postulated mechanism of epistatic interactions (14, 15, 41); however, there is a paucity of direct experimental evidence. To test the role of protein motion in long-range epistasis, we hypothesized that mutations affected the rim interface by altering the flexibility of hydrophobic core residues of NS1. However, it should be noted that our hypothesis does not assume a contiguous pathway between a mutational site to the rim interface. Instead, we expected that the flexibility of individual residues changes differently depending on the position and nature of the mutations. Moreover, the same residue may become more flexible in one NS1 but more rigid in another (**Fig. 6**). Taken together, studying the residue-specific flexibility within individual NS1s might not identify the residues responsible for long-range epistasis.

However, a large statistical variation in the residue-specific flexibility among NS1s indicates that the residue underwent significant changes in flexibility during NS1 evolution. Therefore, we can accept the hypothesis if the residues with a large statistical variation in flexibility are clustered in the hydrophobic core and rim interface (**Fig. 6**).

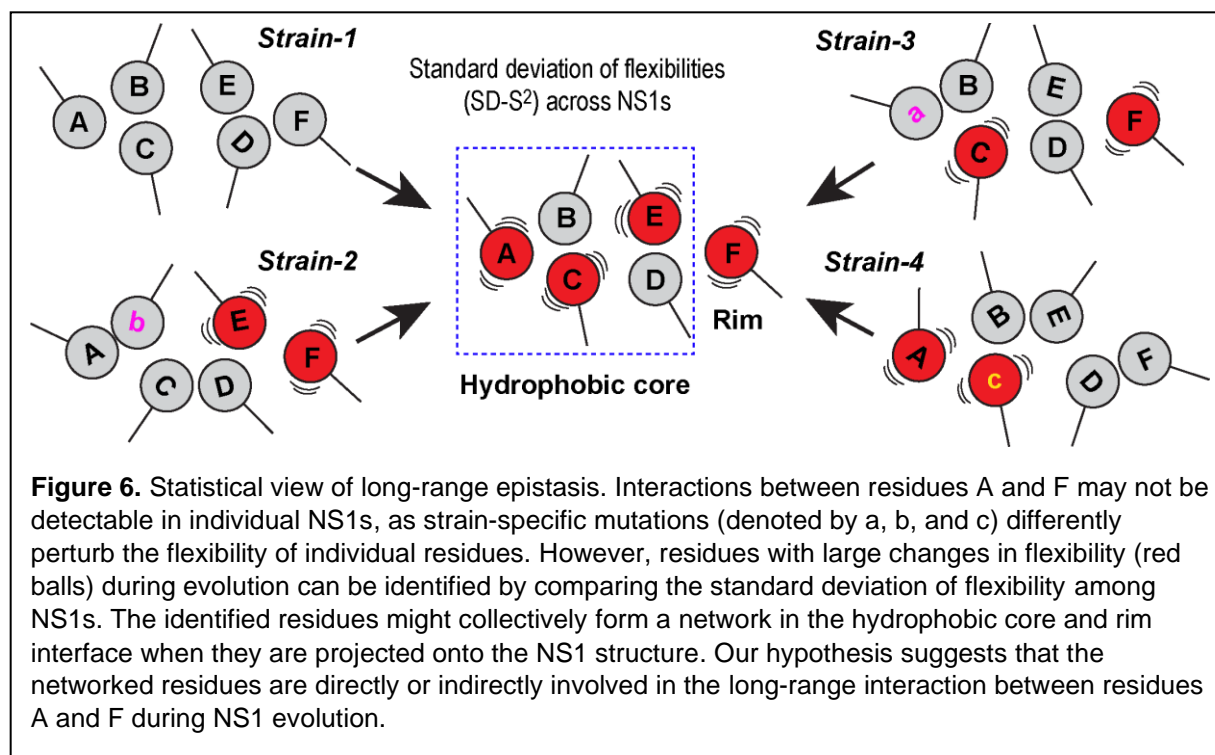

To characterize mutational effects on the flexibility of individual residues of NS1s, we measured the NMR order parameter ( $S^2$ ) of the backbone amide bonds ( $^1\text{H}$ - $^{15}\text{N}$ ) (42). Generally, NMR  $S^2$  characterizes the energy landscape shaped by the conformational flexibility of individual chemical bonds. Here,  $S^2$  probes the energy landscape basin corresponding to the BC-like conformer because it populates 90-99% of the entire population (**Fig. 7A**). For comparison, the NMR CPMG-RD probed the energy landscape shaped by conformational exchange in the slower (typically  $\mu\text{s}$  –  $\text{ms}$ ) timescale (**Fig. 7A**).

Residues with a large standard deviation of  $S^2$  values (i.e.,  $\text{SD-}S^2 > \text{Q3}$ ) across NS1s were identified as dynamically variable residues; that is, the conformational flexibility of these residues fluctuated widely during the evolution of NS1 (**Fig. 7B** and **Fig. S12**). Overall, the backbone amide order parameter ( $S^2_{\text{NH}}$ ) analysis largely recapitulated the mutational effects on the structure: the core interface residues only showed slight variation in  $S^2_{\text{NH}}$  across NS1s, whereas residues with a large  $\text{SD-}S^2_{\text{NH}}$  were mainly in the hydrophobic core and rim interface (**Fig. 7C**). Noticeably, the dynamically variable residues are mainly located at or near the mutational sites and are mainly in the well-folded secondary structures, not in the flexible loops (**Fig. 7C**). This result suggests that the observed variation in dynamics reflects the bona fide mutational effects and not the variation of intrinsically flexible regions by subtle changes in experimental conditions. Thus, site-specific conformational dynamics most likely varied along with the evolution of NS1.

Interestingly, many hydrophobic core residues with a dynamically variable backbone also showed conformational variations in the side-chain based on methyl chemical shift changes (**Fig. S13**). Generally, however, backbone and side-chain dynamics do not necessarily correlate, especially for residues with a long side-chain (43). So, we hypothesized that the high packing density in the

hydrophobic core enabled the facile propagation of mutational effects to a longer range, and as a result, both backbone and side-chain dynamics probe mutational effects in a complementary manner.

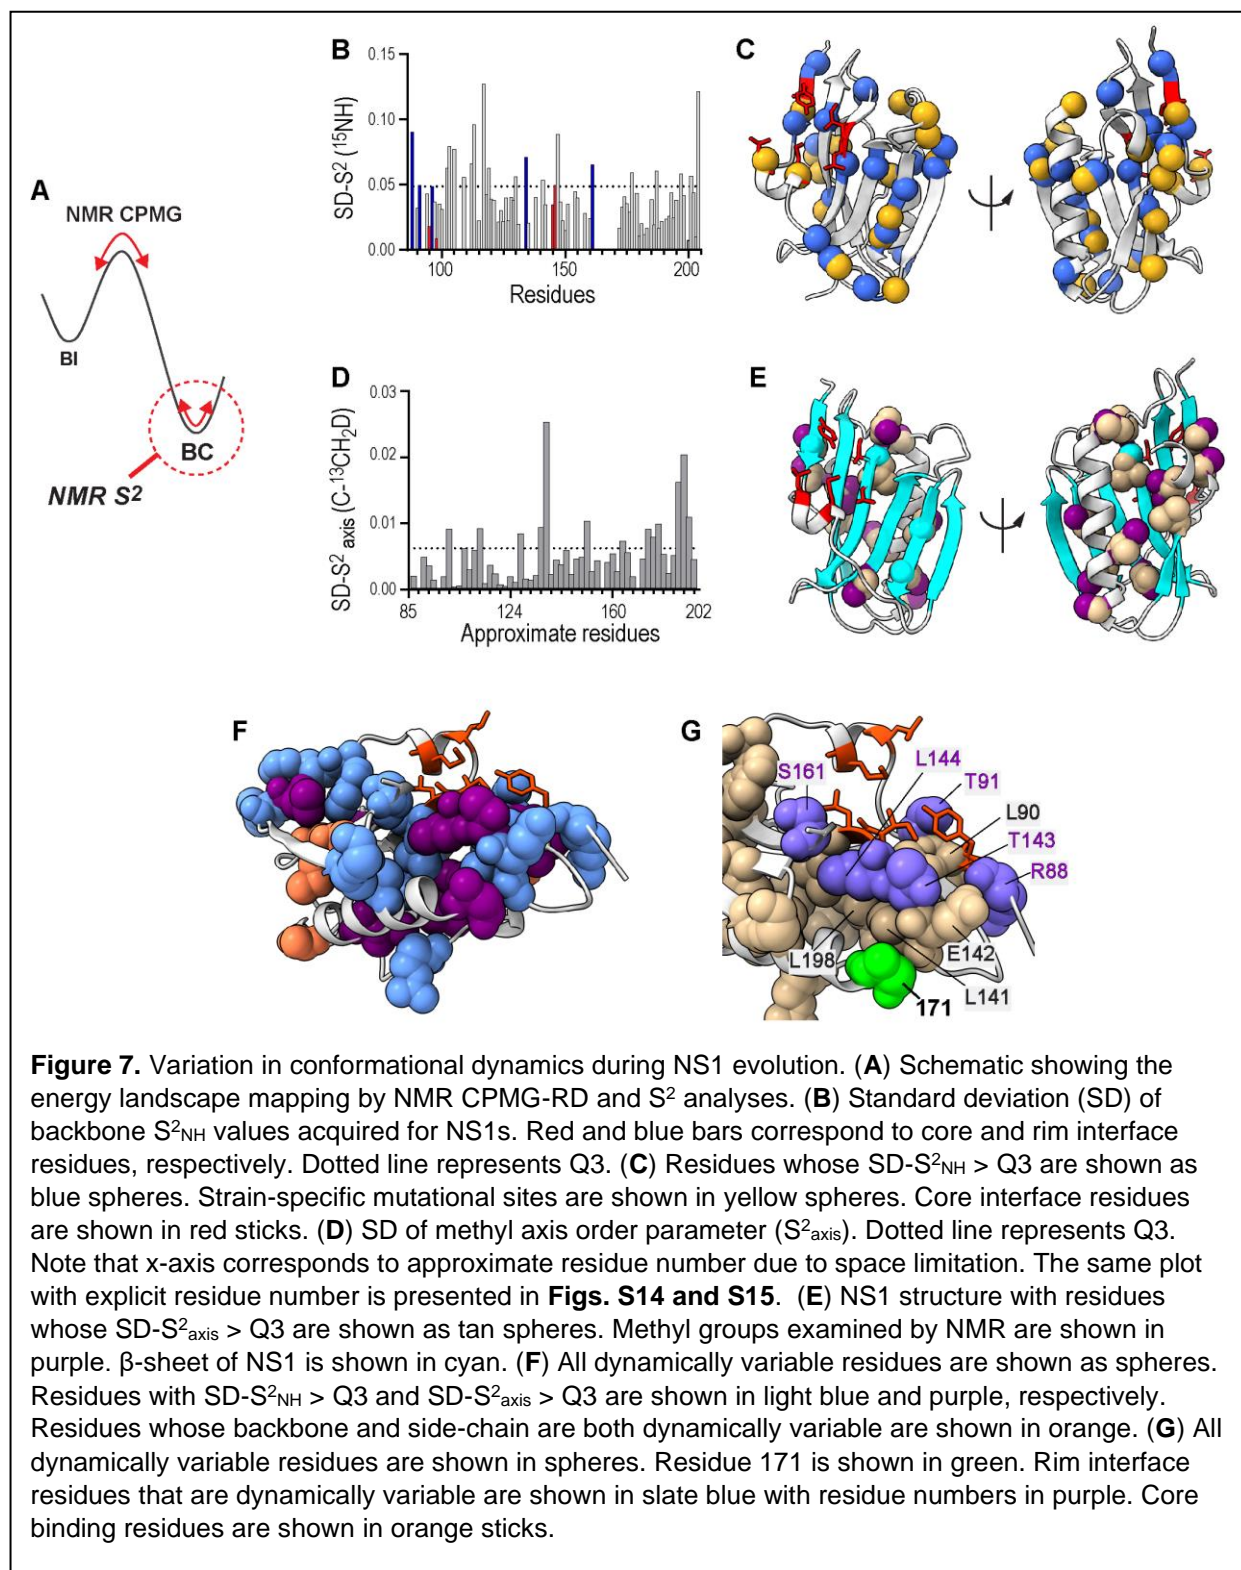



To test the idea, we examined side-chain dynamics by measuring the methyl axis  $S^2$  values based on deuterium relaxation rates in the  $^{13}\text{CH}_2\text{D}$  moiety of the ILVTMA residues (44) (**Figs. S14 and S15**). The dynamically variable side-chains across NS1s ( $\text{SD-}S^2_{\text{axis}} > \text{Q3}$ ) clustered closely in the hydrophobic core; in contrast, none of the core interface residues were dynamically variable across NS1s (**Fig. 7D and 7E**). Moreover, dynamically variable side-chains are near the residues whose backbone is dynamically variable among NS1s (**Fig. 7F and Fig. S12**). For some residues, both backbone and side-chain were dynamically variable. These dynamically variable residues directly contact each other (**Fig. 7F**).

These observations support our hypothesis that a high packing density in the hydrophobic core enables the long-range relay of mutational effects. For example, residue 171 is the most frequently mutated position in NS1 of all human IAVs and directly contacts with residues whose side-chain or backbone showed dynamic variation during NS1 evolution (**Fig. 7G**). This example illustrates how strain-specific mutational effects are transmitted to the rim interface area. Subsequently, it is likely that altered dynamics of the rim interface affect the sampling of productive conformations during the association process to p85 $\beta$ , resulting in strain-dependent epistasis. From the energy landscape perspective, strain-specific mutations altered the conformational energy landscape of NS1s by rearranging the packing interactions, as evidenced by the clustering of dynamically variable residues.

These results demonstrate that near-neutral mutations can silently alter the energy landscape without noticeable changes in functional phenotypes. We speculate that the cumulative effects of near-neutral mutations on the molecular energy landscape help proteins explore new functions during evolution. Therefore, understanding how mutations reshape the biophysical landscape can offer a new mechanistic basis for protein evolution and function (14, 45).

## Discussions

The evolutionary inference of our results should consider the following caveats. The strain-specific mutations in NS1s employed in the present study might not be neutral with respect to *in vivo* viral fitness. For example, although the interaction with p85 $\beta$  is highly conserved, NS1s showed some differences in their interactions with other host factors (24, 46). Thus, we cannot exclude that the mutations in NS1s could affect interactions with other host factors. Here, we cautiously define the “neutral mutation” limited to the association kinetics to p85 $\beta$ , not concerning other cellular or *in vivo* functions.

In the present study, we found long-range, strain-specific epistasis in the NS1s of human IAVs and sought to determine its mechanistic basis. Our structural study revealed that strain-specific mutations have limited impacts on the conformation of core p85 $\beta$ -binding residues. In contrast, the hydrophobic core and rim interface underwent conformational variations across NS1s in the unbound state. Further studies revealed clustering of residues whose conformational dynamics varied during NS1 evolution. Moreover, these residues are in the hydrophobic core of NS1 and the rim interface and are in close contact with strain-specific mutational sites. Therefore, our findings illustrate the high-resolution mechanism whereby a network of closely packed residues underlies long-range epistasis. This result also relates to the coupled conformational dynamics in the evolution of enzyme catalysis and protein allostery (14, 15, 34, 41, 45, 47, 48).

It is noteworthy that the network view of dynamically variable residues only emerges by the statistical measure of fluctuations of conformational (RMSD-CS) and dynamical (SD-S<sup>2</sup>) data across multiple NS1s (Fig. 6). This result indicates that the conformational or dynamical responses of individual residues in the network differ depending on NS1 backgrounds. Indeed, this statistical picture aligns with the fluctuating pattern of long-range epistasis during NS1 evolution (Figs. S4 and S5); strain-specific mutations altered the pattern of epistasis because one mutation remodels the packing interaction differently from another.

Our study also indicated that the molecular energy landscape of NS1s responds more sensitively to mutations during evolution than the functional landscape. For example, strain-specific mutations drastically alter the thermodynamic signature for binding to p85 $\beta$ , in addition to affecting its structure and dynamics. Despite the drastic changes in molecular properties, the functional phenotype (i.e., association to p85 $\beta$ ) did not change accordingly. This result is reminiscent of the thermodynamic system drift, which indicates that diverse biophysical mechanisms can result in the same phenotype during protein evolution (33). Because of the diverse hosts and high zoonotic potential of IAVs, the NS1s employed in this study were the outcome of diverse evolutionary adaptations (49). We conjecture that strain-specific mutations allowed NS1s to explore different evolutionary pathways, resulting in various molecular properties, while the key functionality is conserved. Our results highlight the need for integrated biophysical approaches to reveal hidden molecular foundations of protein evolution.

## Materials and Methods

### Protein sample preparation.

Genes encoding all NS1 EDs and p85 $\beta$  proteins were prepared by gene-synthesis service from Genscript: 1918 NS1 (residues 80 to 205), PR8 NS1 (residues 80 to 206), Ud NS1 (residues 83 to 205), VN NS1 (residues 79 to 206), and p85 $\beta$  (residues 435 to 599). All NS1 proteins contain W187A mutation to prevent protein dimerization and aggregation (50). The incorporation of W187A mutation does not interfere with the binding to p85 $\beta$  (23). All proteins were expressed with the N-terminal His<sub>6</sub> and SUMO tags in BL21 (DE3) E. coli cells and purified by Ni<sup>2+</sup> NTA column chromatography. Tags were removed by SUMO protease and further purified by additional Ni<sup>2+</sup> NTA column and gel-filtration chromatography. All purified proteins were > 95% pure; the purity of protein samples was assessed by sodium dodecyl sulfate polyacrylamide gel electrophoresis.

### NMR sample preparation.

Isotopically-labeled NS1 proteins for NMR studies were prepared by growing BL21 (DE3) E. coli cells in an M9 medium containing <sup>15</sup>NH<sub>4</sub>Cl and <sup>13</sup>C<sub>6</sub> glucose as the sole nitrogen and carbon sources. For deuterium relaxation measurements, NS1 proteins were grown in an M9 medium containing 50% D<sub>2</sub>O/ 50% H<sub>2</sub>O with <sup>15</sup>NH<sub>4</sub>Cl and <sup>13</sup>C<sub>6</sub> glucose. All NMR samples were prepared in a buffer containing 20mM sodium phosphate (pH 7), 80 mM NaCl, 1mM TCEP, 1mM EDTA, and 10% D<sub>2</sub>O for PR8, Ud, and VN NS1s. NMR sample for 1918 NS1 was prepared in a buffer containing 20mM sodium phosphate (pH 7), 80 mM NaCl, 1mM TCEP, 1mM EDTA, 5 mM ATP, 5mM MgCl<sub>2</sub>, and 10% D<sub>2</sub>O. NS1 concentration in NMR samples was 150 – 200  $\mu$ M.

### Bi-layer interferometry.

The binding of surface-immobilized NS1 to p85 $\beta$  was measured at 25 °C using an Octet RED bi-layer interferometry (Pall ForteBio). The N-terminal His<sub>6</sub> and SUMO-tagged NS1 proteins were used for immobilization. The buffer was 20 mM sodium phosphate (pH 7), 150 mM NaCl, 1% bovine serum albumin, and 0.6 M sucrose (51). All reported values are the average and standard deviation of three repeated measurements. Association and dissociation data were fit using single exponential growth and decay functions, respectively. K<sub>D</sub> values were calculated using measured k<sub>on</sub> and k<sub>off</sub> values ( $K_D = k_{off} / k_{on}$ ). For core interface mutants, only k<sub>on</sub> values were calculated by fitting a linear equation to the plot of k<sub>obs</sub> vs. [p85].

### NMR resonance assignment.

NMR experiments were conducted on Bruker 800- and 600-MHz spectrometers equipped with a cryogenic probe at the Biomolecular NMR facility (Texas A&M University). All NMR data were collected at 25 °C. NMR data were processed using NMRPipe(52) and NMRFAM-SPARKY(53). Sequential backbone assignments were performed using 3D triple resonance experiments, including HNCO, HN(CA)CO, HNCACB, CBCA(CO)NH, and HBHA(CO)NH. Side-chain methyl resonance assignments were performed using HCCH-TOCSY, H(CCO)NH, and C(CO)NH experiments. <sup>13</sup>C-edited NOESY HSQC was performed with 100 ms mixing time. Chemical shifts for backbone atoms were deposited in the Biological Magnetic Resonance Bank under accession code 51403 for VN NS1 and 51404 for PR8 NS1.

## NMR $^{15}\text{N}$ Carr-Purcell-Meiboom-Gill (CPMG) relaxation dispersion (RD).

Constant relaxation time  $^{15}\text{N}$  CPMG RD (36-38, 54) data were recorded at 25 °C on Bruker 600- and 800-MHz NMR spectrometers with CPMG frequencies, ranging from 50 to 1,000 Hz, as pseudo-three-dimensional experiments. The uncertainty of  $R_{2,\text{eff}}$  was estimated by duplicated experiments. The relaxation dispersion data were fit using the Carver-Richards equation (55) for a two-state exchange model. Residues undergoing a slow-exchange process were identified based on the Akaike information criterion.

## NMR order parameters.

Three relaxation parameters were measured for backbone amides of NS1s at 25 °C on Bruker 600 and 800 MHz NMR spectrometers. For  $^{15}\text{N}$   $R_1$  and  $R_2$  constants, five relaxation time points were taken with a recycle delay of 2 s, as previously described. For the heteronuclear nuclear Overhauser effect measurements, a recycle delay of 10 s was used in the reference experiment. The steady-state saturation of protons was performed by applying 180° pulses for 4 s (56).  $^2\text{H}$   $R_1$  and  $R_{1\rho}$  relaxation parameters were measured at 25 °C on a Bruker 600 MHz NMR spectrometer; pulse sequences provided by Dr. José A. Caro were used after minor modifications. For  $^2\text{H}$   $R_1$ , six relaxation time points were taken between 0.05 ms and 50 ms. For  $^2\text{H}$   $R_{1\rho}$ , six relaxation time points were taken between 0.2 ms and 20 ms. Uncertainties of the relaxation parameters were estimated using duplicated measurements.

The Lipari-Szabo model-free formalism was used to calculate order parameters(42). Overall correlation times and rotational diffusion tensors for the axially symmetric model were estimated using the program Quadric (57). Backbone order parameters  $S^2_{\text{NH}}$  were calculated following the model-selection protocol and the Akaike information criterion (58). Side-chain methyl axis order parameters  $S^2_{\text{axis}}$  were calculated using the following equation (59).

$$J(\omega) = (2/5) \left[ S^2 \tau_m / (1 + (\omega \tau_m)^2) + (1 - S^2) \tau_i / (1 + (\omega \tau_i)^2) \right]$$

where  $S^2$  is an order parameter for the methyl group,  $\tau_m$  is the overall correlation time, and  $\tau_i^{-1} = \tau_m^{-1} + \tau_{e,i}^{-1}$  with  $\tau_{e,i}$  is the effective correlation time of the internal motions for the  $^{13}\text{C}$ - $^2\text{H}$  bond vector.  $S^2_{\text{axis}}$  was calculated by  $S^2 = 0.111 S^2_{\text{axis}}$ , assuming tetrahedral geometry for the methyl group (59).

$S^2_{\text{axis}}$  values of Leu  $^{13}\text{C}^\delta$ , whose chemical shifts are larger than 24.5 ppm, were eliminated to prevent artifacts arising from a strong  $^{13}\text{C}$ - $^{13}\text{C}$  coupling on  $S^2_{\text{axis}}$  (60).

## NMR H/D exchange.

Buffer containing 150  $\mu\text{M}$   $^{15}\text{N}$  labeled NS1 was exchanged against 20 mM sodium phosphate (pH 7), 80 mM NaCl, 1 mM TCEP, and 1 mM EDTA in 99.9% deuterium oxide using a spin desalting column (Micro Bio-Spin 6, BioRad).  $^{15}\text{N}$ -HSQC spectra were measured every 40 min for 106 hours at 25 °C on Bruker 600 MHz NMR spectrometer. H/D exchange rates of backbone amide resonances of NS1 were calculated from a single exponential fit. Protection factors were calculated from the H/D exchange rate divided by the predicted intrinsic exchange rate from the program SPHERE (61).

### **X-ray crystallography.**

The VN NS1 W187A:p85 $\beta$  complex was crystallized at 277 K by sitting-drop vapor diffusion in 20 mM Tris (pH 7.0) and 80 mM NaCl. The crystal was flash-frozen in liquid nitrogen in the reservoir solution containing 25% (v/v) glycerol. X-ray diffraction datasets were collected at 120 K using an R-Axis IV<sup>++</sup> image plate detector mounted on a Rigaku MicroMax 007HF X-ray generator. The data were processed using iMosflm in the CCP4 package (62). The structure was remodeled and refined with Coot(63) and the Phenix package (**Table S1**). The crystal structure of VN NS1 W187A in a complex with p85 $\beta$  is deposited in the PDB (ID code: 7RCH).

### **ITC measurements.**

All ITC samples were prepared in 20 mM sodium phosphate (pH 7) and 100 mM NaCl, and 2 mM TCEP. Data were recorded at 25 °C using a Microcal-PEAQ-ITC calorimeter (Malvern Panalytical). 100  $\mu$ M p85 $\beta$  was in the syringe, and 10  $\mu$ M NS1 was in the cell. 19 consecutive 2  $\mu$ l aliquots of p85 $\beta$  were titrated into the cell. Data were fit using a 1:1 binding model to obtain  $K_a$ ,  $\Delta H$ , and  $\Delta S$  using software provided with the instrument. All reported parameters are the average and standard deviation of two repeated measurements.

## References

1. D. M. Fowler, S. Fields, Deep mutational scanning: a new style of protein science. *Nat Methods* **11**, 801-807 (2014).
2. Z. R. Sailer, M. J. Harms, Molecular ensembles make evolution unpredictable. *Proc Natl Acad Sci USA* **114**, 11938-11943 (2017).
3. J. Domingo, P. Baeza-Centurion, B. Lehner, The Causes and Consequences of Genetic Interactions (Epistasis). *Annu Rev Genomics Hum Genet* **20**, 433-460 (2019).
4. T. N. Starr, J. W. Thornton, Epistasis in protein evolution. *Protein Sci* **25**, 1204-1218 (2016).
5. J. Zheng, J. L. Payne, A. Wagner, Cryptic genetic variation accelerates evolution by opening access to diverse adaptive peaks. *Science* **365**, 347-353 (2019).
6. F. Baier, N. Hong, G. Yang, A. Pabis, C. M. Miton, A. Barrozo, P. D. Carr, S. C. Kamerlin, C. J. Jackson, N. Tokuriki, Cryptic genetic variation shapes the adaptive evolutionary potential of enzymes. *Elife* **8**, e40789 (2019).
7. A. S. Raman, K. I. White, R. Ranganathan, Origins of Allostery and Evolvability in Proteins: A Case Study. *Cell* **166**, 468-480 (2016).
8. J. D. Bloom, L. I. Gong, D. Baltimore, Permissive secondary mutations enable the evolution of influenza oseltamivir resistance. *Science* **328**, 1272-1275 (2010).
9. E. A. Ortlund, J. T. Bridgham, M. R. Redinbo, J. W. Thornton, Crystal structure of an ancient protein: evolution by conformational epistasis. *Science* **317**, 1544-1548 (2007).
10. M. J. Harms, J. W. Thornton, Evolutionary biochemistry: revealing the historical and physical causes of protein properties. *Nat Rev Genet* **14**, 559-571 (2013).
11. C. M. Miton, K. Buda, N. Tokuriki, Epistasis and intramolecular networks in protein evolution. *Curr Opin Struct Biol* **69**, 160-168 (2021).
12. E. D. Nelson, N. V. Grishin, Long-Range Epistasis Mediated by Structural Change in a Model of Ligand Binding Proteins. *PLoS One* **11**, e0166739 (2016).
13. H. Yu, P. A. Dalby, Coupled molecular dynamics mediate long- and short-range epistasis between mutations that affect stability and aggregation kinetics. *Proc Natl Acad Sci USA* **115**, E11043-E11052 (2018).
14. C. G. Acevedo-Rocha, A. Li, L. D'Amore, S. Hoebenreich, J. Sanchis, P. Lubrano, M. P. Ferla, M. Garcia-Borràs, S. Osuna, M. T. Reetz, Pervasive cooperative mutational effects on multiple catalytic enzyme traits emerge via long-range conformational dynamics. *Nat Commun* **12**, 1621 (2021).
15. P. Campitelli, T. Modi, S. Kumar, S. B. Ozkan, The Role of Conformational Dynamics and Allostery in Modulating Protein Evolution. *Annu Rev Biophys* **49**, 267-288 (2020).
16. J. Carr, J. Ives, N. Roberts, paper presented at the Program and abstracts of the 13th International Conference on Antiviral Research (Baltimore), Rockville, MD, 2000.
17. B. Carrillo, J. M. Choi, Z. A. Bornholdt, B. Sankaran, A. P. Rice, B. V. Prasad, The influenza A virus protein NS1 displays structural polymorphism. *J Virol* **88**, 4113-4122 (2014).
18. J. Ayllon, A. García-Sastre, B. G. Hale, Influenza A viruses and PI3K: are there time, place and manner restrictions? *Virulence* **3**, 411-414 (2012).
19. J. C. Obenauer, J. Denson, P. K. Mehta, X. Su, S. Mukatira, D. B. Finkelstein, X. Xu, J. Wang, J. Ma, Y. Fan, K. M. Rakestraw, R. G. Webster, E. Hoffmann, S. Krauss, J. Zheng, Z. Zhang, C. W. Naeve, Large-scale sequence analysis of avian influenza isolates. *Science* **311**, 1576-1580 (2006).
20. N. S. Heaton, D. Sachs, C. J. Chen, R. Hai, P. Palese, Genome-wide mutagenesis of influenza virus reveals unique plasticity of the hemagglutinin and NS1 proteins. *Proc Natl Acad Sci USA* **110**, 20248-20253 (2013).



21. D. Evseev, K. E. Magor, Molecular Evolution of the Influenza A Virus Non-structural Protein 1 in Interspecies Transmission and Adaptation. *Front Microbiol* **12**, 693204 (2021).
22. M. Selman, S. K. Dankar, N. E. Forbes, J. J. Jia, E. G. Brown, Adaptive mutation in influenza A virus non-structural gene is linked to host switching and induces a novel protein by alternative splicing. *Emerg Microbes Infect* **1**, 1-10 (2012).
23. J. H. Cho, B. Zhao, J. Shi, N. Savage, Q. Shen, J. Byrnes, L. Yang, W. Hwang, P. Li, Molecular recognition of a host protein by NS1 of pandemic and seasonal influenza A viruses. *Proc Natl Acad Sci USA* **117**, 6550-6558 (2020).
24. A. S. Jureka, A. B. Kleinpeter, G. Cornilescu, C. C. Cornilescu, C. M. Petit, Structural Basis for a Novel Interaction between the NS1 Protein Derived from the 1918 Influenza Virus and RIG-I. *Structure* **23**, 2001-2010 (2015).
25. M. G. Koliopoulos, M. Lethier, A. G. van der Veen, K. Haubrich, J. Hennig, E. Kowalinski, R. V. Stevens, S. R. Martin, C. Reis E Sousa, S. Cusack, K. Rittinger, Molecular mechanism of influenza A NS1-mediated TRIM25 recognition and inhibition. *Nat Commun* **9**, 1820 (2018).
26. B. G. Hale, R. E. Randall, PI3K signalling during influenza A virus infections. *Biochem Soc Trans* **35**, 186-187 (2007).
27. T. Sikosek, H. S. Chan, Biophysics of protein evolution and evolutionary protein biophysics. *J R Soc Interface* **11**, 20140419 (2014).
28. J. Echave, Beyond stability constraints: a biophysical model of enzyme evolution with selection on stability and activity. *Mol Biol Evol* **36**, 613-620 (2019).
29. A. Dubrow, I. Kim, E. Topo, J. H. Cho, Understanding the Binding Transition State After the Conformational Selection Step: The Second Half of the Molecular Recognition Process Between NS1 of the 1918 Influenza Virus and Host p85 $\beta$ . *Front Mol Biosci* **8**, 716477 (2021).
30. B. C. Cunningham, J. A. Wells, High-resolution epitope mapping of hGH-receptor interactions by alanine-scanning mutagenesis. *Science* **244**, 1081-1085 (1989).
31. M. Manhart, A. V. Morozov, Protein folding and binding can emerge as evolutionary spandrels through structural coupling. *Proc Natl Acad Sci USA* **112**, 1797-1802 (2015).
32. K. M. Hart, M. J. Harms, B. H. Schmidt, C. Elya, J. W. Thornton, S. Marqusee, Thermodynamic system drift in protein evolution. *PLoS Biol.* **12**, e1001994 (2014).
33. E. Morgunova, Y. Yin, P. K. Das, A. Jolma, F. Zhu, A. Popov, Y. Xu, L. Nilsson, J. Taipale, Two distinct DNA sequences recognized by transcription factors represent enthalpy and entropy optima. *Elife* **7**, e32963 (2018).
34. M. M. Pinney, D. A. Mokhtari, E. Akiva, F. Yabukarski, D. M. Sanchez, R. Liang, T. Doukov, T. J. Martinez, P. C. Babbitt, D. Herschlag, Parallel molecular mechanisms for enzyme temperature adaptation. *Science* **371**, eaay2784 (2021).
35. B. G. Hale, P. S. Kerry, D. Jackson, B. L. Precious, A. Gray, M. J. Killip, R. E. Randall, R. J. Russell, Structural insights into phosphoinositide 3-kinase activation by the influenza A virus NS1 protein. *Proc Natl Acad Sci USA* **107**, 1954-1959 (2010).
36. H. Y. Carr, E. M. Purcell, Effects of diffusion on free precession in nuclear magnetic resonance experiments. *Phys. Rev.* **94**, 630-638 (1954).
37. S. Meiboom, D. Gill, Modified spin-echo method for measuring nuclear relaxation times. *Rev. Sci. Instrum.* **29**, 688-691 (1958).
38. J. P. Loria, M. Rance, A. G. Palmer, A relaxation-compensated Carr-Purcell-Meiboom-Gill sequence for characterizing chemical exchange by NMR spectroscopy. *J. Am. Chem. Soc.* **121**, 2331-2332 (1999).
39. C. A. Olson, N. C. Wu, R. Sun, A comprehensive biophysical description of pairwise epistasis throughout an entire protein domain. *Curr Biol* **24**, 2643-2651 (2014).



40. A. Kumar, C. Natarajan, H. Moriyama, C. C. Witt, R. E. Weber, A. Fago, J. F. Storz, Stability-Mediated Epistasis Restricts Accessible Mutational Pathways in the Functional Evolution of Avian Hemoglobin. *Mol Biol Evol* **34**, 1240-1251 (2017).
41. M. M. González, L. A. Abriata, P. E. Tomatis, A. J. Vila, Optimization of Conformational Dynamics in an Epistatic Evolutionary Trajectory. *Mol Biol Evol* **33**, 1768-1776 (2016).
42. G. Lipari, A. Szabo, Model-free approach to the interpretation of nuclear magnetic resonance relaxation in macromolecules. 1. Theory and range of validity. *J. Am. Chem. Soc.* **104**, 4546-4559 (1982).
43. N. Trbovic, J. H. Cho, R. Abel, R. A. Friesner, M. Rance, A. G. r. Palmer, Protein side-chain dynamics and residual conformational entropy. *J. Am. Chem. Soc.* **131**, 615-622 (2009).
44. N. A. Farrow, O. Zhang, A. Szabo, D. A. Torchia, L. E. Kay, Spectral density function mapping using <sup>15</sup>N relaxation data exclusively. *J. Biomol. NMR* **6**, 153-162 (1995).
45. R. Otten, R. A. P. Pádua, H. A. Bunzel, V. Nguyen, W. Pitsawong, M. Patterson, S. Sui, S. L. Perry, A. E. Cohen, D. Hilvert, D. Kern, How directed evolution reshapes the energy landscape in an enzyme to boost catalysis. *Science* **370**, 1442-1446 (2020).
46. R. L. Kuo, L. H. Li, S. J. Lin, Z. H. Li, G. W. Chen, C. K. Chang, Y. R. Wang, E. H. Tam, Y. N. Gong, R. M. Krug, S. R. Shih, Role of N Terminus-Truncated NS1 Proteins of Influenza A Virus in Inhibiting IRF3 Activation. *J Virol* **90**, 4696-4705 (2016).
47. R. Otten, L. Liu, L. R. Kenner, M. W. Clarkson, D. Mavor, D. S. Tawfik, D. Kern, J. S. Fraser, Rescue of conformational dynamics in enzyme catalysis by directed evolution. *Nat Commun* **9**, 1314 (2018).
48. F. Hajredini, A. Piserchio, R. Ghose, Long-range dynamic correlations regulate the catalytic activity of the bacterial tyrosine kinase Wzc. *Sci Adv* **6**, eabd3718 (2020).
49. J. K. Taubenberger, J. C. Kash, Influenza virus evolution, host adaptation, and pandemic formation. *Cell Host Microbe* **7**, 440-451 (2010).
50. J. M. Aramini, L. C. Ma, L. Zhou, C. M. Schauder, K. Hamilton, B. R. Amer, T. R. Mack, H. W. Lee, C. T. Ciccosanti, L. Zhao, R. Xiao, R. M. Krug, G. T. Montelione, Dimer interface of the effector domain of non-structural protein 1 from influenza A virus: an interface with multiple functions. *J Biol Chem* **286**, 26050-26060 (2011).
51. A. Dubrow, B. Zuniga, E. Topo, J. H. Cho, Suppressing nonspecific binding in bilayer interferometry experiments for weak ligand-analyte interactions. *ACS Omega* **7**, 9206-9211 (2022).
52. F. Delaglio, S. Grzesiek, G. W. Vuister, G. Zhu, J. Pfeifer, A. Bax, NMRPipe: a multidimensional spectral processing system based on UNIX pipes. *J. Biomol. NMR* **6**, 277-293 (1995).
53. W. Lee, M. Tonelli, J. L. Markley, NMRFAM-SPARKY: enhanced software for biomolecular NMR spectroscopy. *Bioinformatics* **31**, 1325-1327 (2015).
54. F. A. Mulder, N. R. Skrynnikov, B. Hon, F. W. Dahlquist, L. E. Kay, Measurement of slow (micros-ms) time scale dynamics in protein side chains by (<sup>15</sup>N) relaxation dispersion NMR spectroscopy: application to Asn and Gln residues in a cavity mutant of T4 lysozyme. *J. Am. Chem. Soc.* **123**, 967-975 (2001).
55. J. P. Carver, R. E. Richards, A general state-site solution for the chemical exchange produced dependence of T<sub>2</sub> upon the Carr-Purcell pulse separation. *J. Magn. Reson.* **6**, 89-105 (1972).
56. F. Ferrage, A. Reichel, S. Battacharya, D. Cowburn, R. Ghose, On the measurement of <sup>15</sup>N-{<sup>1</sup>H} nuclear Overhauser effects. 2. Effects of the saturation scheme and water signal suppression. *J. Magn. Reson.* **207**, 294-303 (2010).
57. L. K. Lee, M. Rance, W. J. Chazin, A. G. r. Palmer, Rotational diffusion anisotropy of proteins from simultaneous analysis of <sup>15</sup>N and <sup>13</sup>C alpha nuclear spin relaxation. *J. Biomol. NMR* **9**, 287-298 (1997).

58. A. M. Mandel, M. Akke, A. G. r. Palmer, Backbone dynamics of Escherichia coli ribonuclease H1: Correlations with structure and function in an active enzyme. *J. Mol. Biol.* **246**, 144-163 (1995).
59. D. R. Muhandiram, T. Yamazaki, B. D. Sykes, L. E. Kay, Measurement of  $2H$  T1 and T1.rho. Relaxation Times in Uniformly  $^{13}C$ -Labeled and Fractionally  $2H$ -Labeled Proteins in Solution. *J. Am. Chem. Soc.* **117**, 11536-11544 (1995).
60. F. Hoffmann, M. Xue, L. V. Schäfer, F. A. A. Mulder, Narrowing the gap between experimental and computational determination of methyl group dynamics in proteins. *Phys Chem Chem Phys* **20**, 24577-24590 (2018).
61. Y. Bai, J. S. Milne, L. Mayne, S. W. Englander, Primary structure effects on peptide group hydrogen exchange. *Proteins* **17**, 75-86 (1993).
62. P. D. Adams, P. V. Afonine, G. Bunkóczi, V. B. Chen, I. W. Davis, N. Echols, J. J. Headd, L.-W. Hung, G. J. Kapral, R. W. Grosse-Kunstleve, A. J. McCoy, N. W. Moriarty, R. Oeffner, R. J. Read, D. C. Richardson, J. S. Richardson, T. C. Terwilliger, P. H. Zwart, PHENIX: a comprehensive Python-based system for macromolecular structure solution. *Acta Crystallogr D Biol Crystallogr* **66**, 213-221 (2010).
63. P. Emsley, B. Lohkamp, W. G. Scott, K. Cowtan, Features and development of Coot. *Acta Crystallogr D Biol Crystallogr* **66**, 486-501 (2010).

## Acknowledgments

We thank Prof. Wonmuk Hwang, Prof. Tatyana Igumenova, and James Gonzales for carefully reading the manuscript and providing constructive comments. **Funding:** Support from NIH grant R01GM127723 (J.H.C.), the Welch Foundation A-2028-20200401 (J.H.C.), USDA National Institute of Food and Agriculture (J.H.C.) grant Hatch project 1020344 is acknowledged. **Author contributions:** J.H.C. conceived the project. I.K. conducted NMR resonance assignments and ITC measurements. A.D. and B.Z. acquired BLI data. B.Z., I.K., P.L., and J.H.C. conducted protein crystallization and structure determination. N.S. and A.B. conducted co-IP. **Competing interests:** The authors declare that they have no competing interests. **Data and materials availability:** All data needed to evaluate the conclusions in the paper are present in the paper and/or the Supplementary Materials.
